# Supplementary material for: Weekly population testing could stop this pandemic and prevent the next
Source: PubMed Central journal article supplement (PMC8278036; doi:10.1098/rsos.210468), 2021-07-14
Supplement: rsos210468_review_history.pdf [file rsos210468_review_history.pdf]

## **Weekly population testing could stop this pandemic and prevent the next**

Julian Peto

### **Article citation details**

*R. Soc. open sci.* **8**: 210468.

<http://dx.doi.org/10.1098/rsos.210468>

### **Review timeline**

Original submission: 18 March 2021

Revised submission: 24 June 2021

Final acceptance: 1 July 2021

Note: Reports are unedited and appear as submitted by the referee. The review history appears in chronological order.

## Review History

### RSOS-210468.R0 (Original submission)

#### Review form: Reviewer 1

**Is the manuscript scientifically sound in its present form?**

Yes

**Are the interpretations and conclusions justified by the results?**

Yes

**Is the language acceptable?**

Yes

**Do you have any ethical concerns with this paper?**

No

**Have you any concerns about statistical analyses in this paper?**

No

**Recommendation?**

Accept with minor revision (please list in comments)

**Comments to the Author(s)**

This is an important contribution. Most western countries failed to combat the covid epidemic effectively due to dogma in a narrow and specialist scientific discipline combined with political inertia. In this review, Julian Peto suggests a trial / demonstration study that would help in convincing decision-makers and specialist scientists that a well designed continuous test-and-isolate strategy could eliminate infectious disease from a population in a real-world setting (from a western society with a relatively high prevalence of infection).

I support publication of this work after minor changes listed below:

\* The test-and-isolate strategy should not be framed as an "alternative" to lockdown, which may be initially needed prior to effective test is developed

\* It would be helpful if the differences between the proposed strategy and the current "targeted" approach to test-and-isolate would be explained more clearly. How much more testing is needed compared to the current approach in the UK?

\* It would be helpful if the reason that the strategy is important in a future epidemic is more clearly stated. The temporal order at which different strategies become available in the best case is: indiscriminate lockdown (days) > test-(trace)-and-isolate (few weeks) > pharmaceuticals (months if already approved drugs work) > vaccines (~ 1 year), with vaccines not necessarily working, and in any case taking far too long to eliminate a fast-spreading disease before it causes a pandemic. This order is unlikely to change before the next pandemic, as technological challenges for making "instant" drugs or vaccines that are safe are enormous, and would require almost complete understanding of chemistry and biology.

The pandemic plan that was executed initially relied on vaccines and natural immunity, and accepted a large number of casualties as inevitable; it would be very important that a new plan would include approaches that work more rapidly.

**Decision letter (RSOS-210468.R0)**

We hope you are keeping well at this difficult and unusual time. We continue to value your support of the journal in these challenging circumstances. If Royal Society Open Science can assist you at all, please don't hesitate to let us know at the email address below.

Dear Dr Peto

On behalf of the Editors, we are pleased to inform you that your Manuscript RSOS-210468 "COVID-19: Stopping this pandemic and preparing for the next" has been accepted for publication in Royal Society Open Science subject to minor revision in accordance with the referees' reports. Please find the referees' comments along with any feedback from the Editors below my signature.

We invite you to respond to the comments and revise your manuscript. Below the referees' and Editors' comments (where applicable) we provide additional requirements. Final acceptance of your manuscript is dependent on these requirements being met. We provide guidance below to help you prepare your revision.

Please submit your revised manuscript and required files (see below) no later than 7 days from today's (ie 18-Jun-2021) date. Note: the ScholarOne system will 'lock' if submission of the revision is attempted 7 or more days after the deadline. If you do not think you will be able to meet this deadline please contact the editorial office immediately.

Please note article processing charges apply to papers accepted for publication in Royal Society Open Science (<https://royalsocietypublishing.org/rsos/charges>). Charges will also apply to papers transferred to the journal from other Royal Society Publishing journals, as well as papers submitted as part of our collaboration with the Royal Society of Chemistry (<https://royalsocietypublishing.org/rsos/chemistry>). Fee waivers are available but must be requested when you submit your revision (<https://royalsocietypublishing.org/rsos/waivers>).

Thank you for submitting your manuscript to Royal Society Open Science and we look forward to receiving your revision. If you have any questions at all, please do not hesitate to get in touch.

Kind regards,  
Royal Society Open Science Editorial Office  
Royal Society Open Science  
[openscience@royalsociety.org](mailto:openscience@royalsociety.org)

on behalf of Dr Julian Huppert (Associate Editor) and Nick Pearce (Subject Editor)  
[openscience@royalsociety.org](mailto:openscience@royalsociety.org)

Associate Editor Comments to Author (Dr Julian Huppert):

Thank you for submitting this interesting paper. I'm sorry it has taken so long to arrange appropriate peer review.

This paper is suitable for publication with a few minor changes. Please respond to the referee's specific comments in the revised manuscript.

You may also want to consider commenting on efforts to do large-scale asymptomatic weekly testing, such as the University of Cambridge programme, which started last October.  
<https://www.cam.ac.uk/coronavirus/stay-safe-cambridge-uni/asymptomatic-covid-19-screening-programme>

You may also wish to take the opportunity to update any relevant aspects of the paper given more recent events.

Reviewer comments to Author:  
Reviewer: 1  
Comments to the Author(s)

This is an important contribution. Most western countries failed to combat the covid epidemic effectively due to dogma in a narrow and specialist scientific discipline combined with political inertia. In this review, Julian Peto suggests a trial / demonstration study that would help in convincing decision-makers and specialist scientists that a well designed continuous test-and-isolate strategy could eliminate infectious disease from a population in a real-world setting (from a western society with a relatively high prevalence of infection).

I support publication of this work after minor changes listed below:

- \* The test-and-isolate strategy should not be framed as an "alternative" to lockdown, which may be initially needed prior to effective test is developed
- \* It would be helpful if the differences between the proposed strategy and the current "targeted" approach to test-and-isolate would be explained more clearly. How much more testing is needed compared to the current approach in the UK?
- \* It would be helpful if the reason that the strategy is important in a future epidemic is more clearly stated. The temporal order at which different strategies become available in the best case is: indiscriminate lockdown (days) > test-(trace)-and-isolate (few weeks) > pharmaceuticals (months if already approved drugs work) > vaccines (~ 1 year), with vaccines not necessarily working, and in any case taking far too long to eliminate a fast-spreading disease before it causes a pandemic. This order is unlikely to change before the next pandemic, as technological challenges for making "instant" drugs or vaccines that are safe are enormous, and would require almost complete understanding of chemistry and biology.

The pandemic plan that was executed initially relied on vaccines and natural immunity, and accepted a large number of casualties as inevitable; it would be very important that a new plan would include approaches that work more rapidly.

===PREPARING YOUR MANUSCRIPT===

Your revised paper should include the changes requested by the referees and Editors of your manuscript. You should provide two versions of this manuscript and both versions must be provided in an editable format:

one version identifying all the changes that have been made (for instance, in coloured highlight, in bold text, or tracked changes);

a 'clean' version of the new manuscript that incorporates the changes made, but does not highlight them. This version will be used for typesetting.

Please ensure that any equations included in the paper are editable text and not embedded images.

Please ensure that you include an acknowledgements' section before your reference list/bibliography. This should acknowledge anyone who assisted with your work, but does not qualify as an author per the guidelines at <https://royalsociety.org/journals/ethics-policies/openness/>.

While not essential, it will speed up the preparation of your manuscript proof if you format your references/bibliography in Vancouver style (please see <https://royalsociety.org/journals/authors/author-guidelines/#formatting>). You should include DOIs for as many of the references as possible.

If you have been asked to revise the written English in your submission as a condition of publication, you must do so, and you are expected to provide evidence that you have received language editing support. The journal would prefer that you use a professional language editing service and provide a certificate of editing, but a signed letter from a colleague who is a native speaker of English is acceptable. Note the journal has arranged a number of discounts for authors using professional language editing services (<https://royalsociety.org/journals/authors/benefits/language-editing/>).

===PREPARING YOUR REVISION IN SCHOLARONE===

To revise your manuscript, log into <https://mc.manuscriptcentral.com/rsos> and enter your Author Centre - this may be accessed by clicking on "Author" in the dark toolbar at the top of the page (just below the journal name). You will find your manuscript listed under "Manuscripts with Decisions". Under "Actions", click on "Create a Revision".

Attach your point-by-point response to referees and Editors at Step 1 'View and respond to decision letter'. This document should be uploaded in an editable file type (.doc or .docx are preferred). This is essential.

Please ensure that you include a summary of your paper at Step 2 'Type, Title, & Abstract'. This should be no more than 100 words to explain to a non-scientific audience the key findings of your research. This will be included in a weekly highlights email circulated by the Royal Society press office to national UK, international, and scientific news outlets to promote your work.

At Step 3 'File upload' you should include the following files:

-- Your revised manuscript in editable file format (.doc, .docx, or .tex preferred). You should upload two versions:

- 1) One version identifying all the changes that have been made (for instance, in coloured highlight, in bold text, or tracked changes);
- 2) A 'clean' version of the new manuscript that incorporates the changes made, but does not highlight them.

-- An individual file of each figure (EPS or print-quality PDF preferred [either format should be produced directly from original creation package], or original software format).

-- An editable file of each table (.doc, .docx, .xls, .xlsx, or .csv).

-- An editable file of all figure and table captions.

Note: you may upload the figure, table, and caption files in a single Zip folder.

-- Any electronic supplementary material (ESM).

-- If you are requesting a discretionary waiver for the article processing charge, the waiver form must be included at this step.

-- If you are providing image files for potential cover images, please upload these at this step, and inform the editorial office you have done so. You must hold the copyright to any image provided.

-- A copy of your point-by-point response to referees and Editors. This will expedite the preparation of your proof.

At Step 6 'Details & comments', you should review and respond to the queries on the electronic submission form. In particular, we would ask that you do the following:

-- Ensure that your data access statement meets the requirements at

<https://royalsociety.org/journals/authors/author-guidelines/#data>. You should ensure that you cite the dataset in your reference list. If you have deposited data etc in the Dryad repository, please only include the 'For publication' link at this stage. You should remove the 'For review' link.

-- If you are requesting an article processing charge waiver, you must select the relevant waiver option (if requesting a discretionary waiver, the form should have been uploaded at Step 3 'File upload' above).

-- If you have uploaded ESM files, please ensure you follow the guidance at

<https://royalsociety.org/journals/authors/author-guidelines/#supplementary-material> to include a suitable title and informative caption. An example of appropriate titling and captioning may be found at [https://figshare.com/articles/Table\\_S2\\_from\\_Is\\_there\\_a\\_trade-off\\_between\\_peak\\_performance\\_and\\_performance\\_breadth\\_across\\_temperatures\\_for\\_aerobic\\_scope\\_in\\_teleost\\_fishes\\_/3843624](https://figshare.com/articles/Table_S2_from_Is_there_a_trade-off_between_peak_performance_and_performance_breadth_across_temperatures_for_aerobic_scope_in_teleost_fishes_/3843624).

At Step 7 'Review & submit', you must view the PDF proof of the manuscript before you will be able to submit the revision. Note: if any parts of the electronic submission form have not been completed, these will be noted by red message boxes.

## Author's Response to Decision Letter for (RSOS-210468.R0)

See Appendix A.

## Decision letter (RSOS-210468.R1)

We hope you are keeping well at this difficult and unusual time. We continue to value your support of the journal in these challenging circumstances. If Royal Society Open Science can assist you at all, please don't hesitate to let us know at the email address below.

Dear Dr Peto,

It is a pleasure to accept your manuscript entitled "Weekly population testing could stop this pandemic and prevent the next" in its current form for publication in Royal Society Open Science.

COVID-19 rapid publication process:

We are taking steps to expedite the publication of research relevant to the pandemic. If you wish, you can opt to have your paper published as soon as it is ready, rather than waiting for it to be published the scheduled Wednesday.

This means your paper will not be included in the weekly media round-up which the Society sends to journalists ahead of publication. However, it will still appear in the COVID-19 Publishing Collection which journalists will be directed to each week (<https://royalsocietypublishing.org/topic/special-collections/novel-coronavirus-outbreak>).

If you wish to have your paper considered for immediate publication, or to discuss further, please notify [openscience\\_proofs@royalsociety.org](mailto:openscience_proofs@royalsociety.org) and [press@royalsociety.org](mailto:press@royalsociety.org) when you respond to this email.

You can expect to receive a proof of your article in the near future. Please contact the editorial office ([openscience@royalsociety.org](mailto:openscience@royalsociety.org)) and the production office ([openscience\\_proofs@royalsociety.org](mailto:openscience_proofs@royalsociety.org)) to let us know if you are likely to be away from e-mail contact -- if you are going to be away, please nominate a co-author (if available) to manage the proofing process, and ensure they are copied into your email to the journal.

Due to rapid publication and an extremely tight schedule, if comments are not received, your paper may experience a delay in publication.

Please see the Royal Society Publishing guidance on how you may share your accepted author manuscript at <https://royalsociety.org/journals/ethics-policies/media-embargo/>. After publication, some additional ways to effectively promote your article can also be found here <https://royalsociety.org/blog/2020/07/promoting-your-latest-paper-and-tracking-your-results/>.

Thank you for your fine contribution. On behalf of the Editors of Royal Society Open Science, we look forward to your continued contributions to the Journal.

Kind regards,  
Royal Society Open Science Editorial Office  
Royal Society Open Science  
openscience@royalsociety.org

on behalf of Dr Julian Huppert (Associate Editor) and Nick Pearce (Subject Editor)  
openscience@royalsociety.org

Follow Royal Society Publishing on Twitter: @RSocPublishing  
Follow Royal Society Publishing on Facebook:  
<https://www.facebook.com/RoyalSocietyPublishing.FanPage/>  
Read Royal Society Publishing's blog:  
<https://royalsociety.org/blog/blogsearchpage/?category=Publishing>

# Appendix A

Dear Dr Huppert

Manuscript RSOS-210468

Responses to the referee's comments are given below. The manuscript has also been updated as you suggested to take account of developments over the 3 months since it was submitted, notably the emergence and rapid spread of the delta variant and relevant new references. A paragraph on RT-LAMP has also been added. The referee asked how many more tests would be needed, and the fact that the tenfold increase to almost 10 million tests per day can be achieved rapidly by establishing local RT-LAMP testing facilities is a crucial aspect of my case.

I hope you will agree that these amendments do not require further external review, as the new delta variant is now spreading exponentially. The aim of the piece is to provoke public discussion and hence rapid government action to conduct this experiment in a few cities, not to argue that mass testing would certainly be effective. Please let me know whether there is likely to be a long further delay before publication.

You suggested adding a section on the testing of staff and students at Cambridge. Many universities and various employers have introduced such schemes but the results do not reflect the coverage and impact that testing a whole city might achieve, as the populations tested are unrepresentative (young and educated) and are not protected from infection from the rest of the local community. A review of the results would have to be extensively referenced and would not materially affect the case for city-wide demonstration projects.

Best wishes

Julian Peto

Reply to reviewer comments to Author:

Reviewer: 1

Comments to the Author(s)

This is an important contribution. Most western countries failed to combat the covid epidemic effectively due to dogma in a narrow and specialist scientific discipline combined with political inertia. In this review, Julian Peto suggests a trial / demonstration study that would help in convincing decision-makers and specialist scientists that a well designed continuous test-and-isolate strategy could eliminate infectious disease from a population in a real-world setting (from a western society with a relatively high prevalence of infection).

I support publication of this work after minor changes listed below:

\* The test-and-isolate strategy should not be framed as an "alternative" to lockdown, which may be initially needed prior to effective test is developed.

Author reply: "Lockdown" is ill-defined, so I have substituted "social restrictions" throughout. The amended text now makes it clear that I am suggesting that social restrictions could be stopped when most people have been vaccinated and population testing has been set up:

"These observations [the Slovakian data] support the suggestion that a month or two of weekly testing with high coverage and household quarantine might be an effective and much less



economically damaging alternative to maintaining social restrictions to control the sharp recent increase in prevalence due to the delta variant as vaccination is rolled out (4).”

\* It would be helpful if the differences between the proposed strategy and the current "targeted" approach to test-and-isolate would be explained more clearly. How much more testing is needed compared to the current approach in the UK?

Author reply: I have inserted a new para on RT-LAMP which begins:

“Weekly testing with good uptake and compliance with quarantine might increase the effectiveness of testing and tracing in the UK by an order of magnitude. Daily testing capacity is still only about 800,000 (6), less than 10% of the 10 million tests per day needed for weekly testing of the whole UK population. That increase in capacity could be achieved rapidly and economically by setting up local facilities in each city for RT-LAMP testing (4).”

\* It would be helpful if the reason that the strategy is important in a future epidemic is more clearly stated. The temporal order at which different strategies become available in the best case is: indiscriminate lockdown (days) > test-(trace)-and-isolate (few weeks) > pharmaceuticals (months if already approved drugs work) > vaccines (~ 1 year), with vaccines not necessarily working, and in any case taking far too long to eliminate a fast-spreading disease before it causes a pandemic. This order is unlikely to change before the next pandemic, as technological challenges for making "instant" drugs or vaccines that are safe are enormous, and would require almost complete understanding of chemistry and biology.

The pandemic plan that was executed initially relied on vaccines and natural immunity, and accepted a large number of casualties as inevitable; it would be very important that a new plan would include approaches that work more rapidly.

Author reply: If the system for population testing by RT-LAMP is established now it could be reinstated within weeks to control a future pandemic before lockdown becomes necessary when infection rates are still low and before new more infectious variants have evolved. A local RT-LAMP testing facility is very much easier to set up than the UK's very large regional PCR "lighthouse" labs. The relevant amended text is:

“Moreover, if SARS-CoV-2 can be controlled by weekly testing the next pandemic, which may be caused by a much more deadly new virus, could probably also be suppressed while a vaccine is being developed and distributed. Establishing the local framework for population testing in a few cities and evaluating its impact on R during this pandemic should be prioritised for that reason alone. The system could be rapidly reinstated, together with testing for international passengers, at an early stage of a future pandemic before more infectious variants have evolved.”
